# Supplementary material
Source: PubMed Central journal article supplement (PMC6933572)
Supplement: Supplementary_(1).pdf [file Supplementary_%281%29.pdf]

| First Author   | Date Published | Social group    | Title                                                                                                                                            | n    | Sex                 | Country             | Type of study                        | Age                          | Age group          | Sport                                              | Theme                     |
|----------------|----------------|-----------------|--------------------------------------------------------------------------------------------------------------------------------------------------|------|---------------------|---------------------|--------------------------------------|------------------------------|--------------------|----------------------------------------------------|---------------------------|
| Ali            | 2011           | peers           | Weight-related behavior among adolescents: the role of peer effects                                                                              | 3898 | both girls & boys   | US                  | longitudinal (Add Health)            | grades 7-12                  | adolescent         | general                                            | Reasons for participation |
| Alley          | 2005           | peers           | Peer attitudes towards adolescent participants in male- and female-oriented sports                                                               | 69   | both girls & boys   | US (South Carolina) | cross-sectional                      | high school                  | adolescent         | ballet, tennis, karate                             | Social Norms              |
| Amado          | 2015           | parents         | Incidence of Parental Support and Pressure on Their Children's Motivational Processes towards Sport Practice Regarding Gender                    | 321  | both girls & boys   | Spain               | cross-sectional                      | 10 to 16                     | adolescent         | general                                            | Parent support            |
| Anderson       | 2011           | peers & parents | Ethnic, gender, and BMI differences in athletic identity in children and adolescents                                                             | 2007 | both boys and girls | United States       | cross-sectional                      | 4th/5th, 7th/8th grade       | child & adolescent | general                                            | Parent support            |
| Baar           | 2011           | peers           | Machiavellianism in children in Dutch elementary schools and sports clubs: Prevalence and stability according to context, sport type, and gender | 1425 | both girls & boys   | Netherlands         | cross-sectional                      | 10 to 12 years               | child              | martial arts, contact, noncontact (school vs club) | Teammates                 |
| Bassett-Gunter | 2017           | parents         | Parent Support for Children's Physical Activity: A Qualitative Investigation of Barriers and Strategies                                          | 21   | both girls & boys   | Canada              | cross-sectional                      | parents of 5 to 11 year olds | child              | general                                            | Parent support            |
| Basterfield    | 2016           | peers & parents | Can't play, won't play: longitudinal changes in perceived barriers to participation in sports clubs across                                       | 500  | both girls & boys   | England             | longitudinal (Gateshead Millennium ) | 9 and 12                     | child & adolescent | general                                            | Reasons/ barriers         |

the child-adolescent transition

|              |      |         |                                                                                                                      |      |                     |               |                                    |                   |                    |                                               |                           |
|--------------|------|---------|----------------------------------------------------------------------------------------------------------------------|------|---------------------|---------------|------------------------------------|-------------------|--------------------|-----------------------------------------------|---------------------------|
| Baxter-Jones | 2003 | parents | Parental influence on sport participation in elite young athletes                                                    | 282  | both boys and girls | England       | longitudinal and interdisciplinary | 8 to 17 years old | child & adolescent | soccer, gymnastics, tennis, swimming          | Parent support            |
| Bean         | 2014 | family  | Understanding how organized youth sport maybe harming individual players within the family unit: a literature review | N/A  | both boys and girls | Canada        | review                             | 6 to 18           | child & adolescent | general PA                                    | Reasons/barriers          |
| Berntsson    | 2014 | parents | Swedish parents' activities together with their children and children's health: a study of children aged 2-17 years  | 1461 | both boys & girls   | United States | cross-sectional                    | 2 to 17 years old | child & adolescent | general PA                                    | Parent support            |
| Beunen       | 1999 | family  | Genetic determinants of sports participation and daily physical activity                                             | N/A  | both girls & boys   | Worldwide     | review                             |                   |                    | general PA                                    | Sporting family           |
| Bigelow      | 1989 | peers   | Sport-involved children's friendship expectations                                                                    | 80   | both girls & boys   | Canada        | cross-sectional                    | 9 to 12           | child              | ringette, minor hockey                        | Friendships               |
| Boomsma      | 1989 | family  | Resemblances of parents and twins in sports participation and heart rate                                             | 180  | both girls & boys   | Netherlands   | cross-sectional                    | 14 to 20          | adolescent         | general PA                                    | Sporting family           |
| Bosselut     | 2012 | peers   | Reciprocity of the relationship between role ambiguity and group cohesion in youth interdependent sport              | 162  | both girls & boys   | Canada        | longitudinal                       | 12 to 18          | adolescent         | indoor soccer, volleyball, basketball, hockey | Teammates                 |
| Boufous      | 2004 | parents | Parental safety concerns--a barrier to sport and physical activity in children?                                      | 5876 | both boys and girls | Australia     | cross-sectional                    | 5 to 12 years old | child              | general                                       | Reasons for participation |

|          |      |                 |                                                                                                                                                |        |                     |                |                          |              |            |                                                                    |                           |
|----------|------|-----------------|------------------------------------------------------------------------------------------------------------------------------------------------|--------|---------------------|----------------|--------------------------|--------------|------------|--------------------------------------------------------------------|---------------------------|
| Breiger  | 2015 | peers           | Winning, motivational climate, and young athletes' competitive experiences: Some notable sex differences                                       | 99     | both girls & boys   | US             | cross-sectional          | 10 to 14     | adolescent | basketball                                                         | Motivational climate      |
| Brophy   | 2011 | parents         | Parental factors associated with walking to school and participation in organised activities at age 5: analysis of the Millennium Cohort Study | 17,561 | both girl & boys    | United Kingdom | longitudinal (Millenium) | 5 years old  | child      | general                                                            | Parent support            |
| Bruner   | 2014 | peers           | Social identity and prosocial and antisocial behavior in youth sport                                                                           | 426    | both girls & boys   | Canada         | logitudinal              | high school  | adolescent | basketball, soccer, ice hockey, american football, rugby, lacrosse | Teammates                 |
| Bruner   | 2017 | peers           | Examining social identity and intrateam moral behaviours in competitive youth ice hockey using stimulated recall                               | 23     | both girls & boys   | Canada         | qualitative              | 11 to 17     | adolescent | ice hockey                                                         | Teammates                 |
| Buchanan | 1976 | peers           | Academic and Athletic Ability as Popularity Factors in Elementary School Children                                                              | 802    | both boys and girls | US (Georgia)   | cross-sectional          | grades 4-6   | child      | general                                                            | Social Norms              |
| Burke    | 1976 | peers & parents | Locus of Control and Other Psycho-Social Parameters in Successful American Age-Group Swimmers                                                  | 89     | both girls & boys   | US             | cross-sectional          | 14 to 18     | adolescent | swimming                                                           | Reasons for participation |
| Busey    | 2007 | parents         | A survey of inner city youth and their parents about participation in sports                                                                   | 138    | both boys and girls | United States  | cross-sectional          | 10 years old | child      | general                                                            | Reasons for participation |

|           |      |                 |                                                                                                                                                  |      |                     |                |                 |                          |                    |                                              |                           |
|-----------|------|-----------------|--------------------------------------------------------------------------------------------------------------------------------------------------|------|---------------------|----------------|-----------------|--------------------------|--------------------|----------------------------------------------|---------------------------|
| Caglar    | 2017 | peers & parents | Roles of Perceived Motivational Climates Created by Coach, Peer, and Parent on Dispositional Flow in Young Athletes                              | 220  | both girls & boys   | Turkey         | cross-sectional | 14-17                    | adolescent         | basketball, soccer, volleyball, and handball | Motivational climate      |
| Camporesi | 2016 | parents         | Ethics, genetic testing, and athletic talent: children's best interests, and the right to an open (athletic) future                              | none | both girls and boys | United Kingdom | Review          | n/a                      |                    | n/a                                          | Sporting family           |
| Casey     | 2009 | peers & parents | Using a socioecological approach to examine participation in sport and physical activity among rural adolescent girls                            | 34   | girls               | Australia      | qualitative     | Grade 7 (12 to 13 years) | adolescent         | general                                      | Multiple                  |
| Chan      | 2012 | peers & parents | Influences of coaches, parents, and peers on the motivational patterns of child and adolescent athletes                                          | 408  | both girls & boys   | China          | cross-sectional | 9 to 18 years            | child & adolescent | swimming                                     | Motivational climate      |
| Chen      | 2014 | parents         | An exploratory study on the relationship between parents' passion for sport/exercise and children's self- and task-perceptions in sport/exercise | 312  | both girls & boys   | Taiwan         | cross-sectional | 5-6 grade and parents    | child              | general                                      | Motivational climate      |
| Ciairano  | 2007 | peers           | Sport, stress, self-efficacy and aggression towards peers: Unravelling the role of the coach                                                     | 159  | both girls & boys   | Italy          | cross-sectional | 11 to 18                 | adolescent         | general                                      | Teammates                 |
| Clarke    | 2016 | family          | A Phenomenological Interpretation of the Parent-Child Relationship in Elite Youth Football                                                       | 8    | both boys and girls | England        | qualitative     | 12 to 17                 | adolescent         | soccer                                       | Reasons for participation |

|              |      |                 |                                                                                                                                                                  |     |                     |               |                 |                                         |                    |                                           |                           |
|--------------|------|-----------------|------------------------------------------------------------------------------------------------------------------------------------------------------------------|-----|---------------------|---------------|-----------------|-----------------------------------------|--------------------|-------------------------------------------|---------------------------|
| Coleman      | 2008 | peers & parents | Girls and young women's participation in physical activity: psychological and social influences                                                                  | 75  | girls               | UK            | qualitative     | 15 to 19 years                          | adolescent         | general                                   | Reasons/barr<br>iers      |
| Cumming      | 2006 | parents         | Estimated maturity status and perceptions of adult autonomy support in youth soccer players                                                                      | 113 | both girls & boys   | United States | cross-sectional | 9 to 15 years old                       | child & adolescent | soccer                                    | Motivational climate      |
| Danioni      | 2017 | parents         | Transmitting Sport Values: The Importance of Parental Involvement in Children's Sport Activity                                                                   | 172 | both boys and girls | Italy         | cross-sectional | 13 to 19 years old                      | adolescent         | volleyball, basketball, soccer, and rugby | Reasons for participation |
| De Lepeleere | 2013 | parents         | What practices do parents perceive as effective or ineffective in promoting a healthy diet, physical activity, and less sitting in children: parent focus groups | 21  | both girls & boys   | Belgium       | cross-sectional | 34 to 50 years old of 6 to 12 year kids | child              | general                                   | Reasons for participation |
| Deflandre    | 2001 | peers & parents | Physical activity and sport involvement in French high school students                                                                                           | 48  | both boys and girls | France        | cross-sectional | 16 to 19                                | adolescent         | general                                   | Reasons for participation |
| Deflandre    | 2001 | peers & parents | Determinants of physical activity and physical and sports activities in French school children                                                                   | 80  | both boys and girls | France        | cross-sectional | 11 to 16                                | adolescent         | general                                   | Sporting family           |
| Denault      | 2009 | peers & parents | Predictors of Adolescent Participation in Organized Activities: A Five-Year Longitudinal Study                                                                   | 272 | both boys and girls | Canada        | longitudinal    | Grades 6 to 10                          | adolescent         | general                                   | Reasons for participation |

|           |      |                 |                                                                                                                                |      |                     |               |                 |                     |                    |         |                      |
|-----------|------|-----------------|--------------------------------------------------------------------------------------------------------------------------------|------|---------------------|---------------|-----------------|---------------------|--------------------|---------|----------------------|
| Dollman   | 2010 | parents         | Changing associations of Australian parents' physical activity with their children's sport participation: 1985 to 2004         | 818  | both boys and girls | Australia     | cross-sectional | 9 to 15 years old   | child & adolescent | general | Sporting family      |
| Drenowatz | 2014 | parents         | Parental characteristics have a larger effect on children's health behaviour than their body weight                            | 1118 | both girls & boys   | Germany       | cross-sectional | 2nd graders         | child              | club    | Sporting family      |
| Duncan    | 2005 | peers & parents | Personal, Family, and Peer Correlates of General and Sport Physical Activity among African American, Latino, and White Girls   | 372  | girls               | United States | cross-sectional | 10,12,14 year old   | adolescent         | general | Reasons/barriers     |
| Ebbeck    | 1994 | parents         | Psychosocial predictors of goal orientations in youth soccer                                                                   | 166  | both boys and girls | US            | cross-sectional | 10 to 14            | adolescent         | soccer  | Motivational climate |
| Eime      | 2013 | peers & parents | Family support and ease of access link socio-economic status and sports club membership in adolescent girls: a mediation study | 732  | girls               | Australia     | cross-sectional | 11 to 20 years old  | adolescent         | general | Parent support       |
| Eime      | 2010 | peers & parents | Transition in participation in sport and unstructured physical activity for rural living adolescent girls                      | 27   | girls               | Australia     | qualitative     | 16 to 17 years old  | adolescent         | general | Multiple             |
| Erkelenz  | 2014 | parents         | Parental Activity as Influence on Children's BMI Percentiles and Physical Activity                                             | 1615 | both boys and girls | Germany       | cross-sectional | 71 +- 0.6 years old |                    | general | Parent support       |

|            |      |                 |                                                                                                                    |      |                     |                       |                 |                              |                    |                            |                      |
|------------|------|-----------------|--------------------------------------------------------------------------------------------------------------------|------|---------------------|-----------------------|-----------------|------------------------------|--------------------|----------------------------|----------------------|
| Evans      | 2016 | peers           | Bullying Victimization and Perpetration Among Adolescent Sport Teammates                                           | 359  | both boys and girls | Canada                | cross-sectional | 13 to 17                     | adolescent         | general                    | Teammates            |
| Fernandez  | 2015 | parents         | Parental modeling, education and children's sports and TV time: the ENERGY-project                                 | 5729 | both boys and girls | Europe                | cross-sectional | 10 to 12 years old           | child              | general                    | Parent support       |
| Gadzic     | 2009 | peers           | Participation in Sports and Sociometric Status of Adolescents                                                      | 359  | both boys and girls | Serbia                | cross-sectional | 16 to 19                     | adolescent         | general                    | Social Norms         |
| Gavin      | 2016 | peers & parents | Adolescents' Perception of the Psychosocial Factors affecting Sustained Engagement in Sports and Physical Activity | 16   | both girls & boys   | Canada                | qualitative     | 15 to 17                     | adolescent         | general                    | Reasons/barriers     |
| Gould      | 2006 | parents         | Understanding the role parents play in tennis success: a national survey of junior tennis coaches                  | 132  | both girls & boys   | United States         | cross-sectional |                              |                    | tennis                     | Parent support       |
| Guest      | 2008 | peers           | Reconsidering Teamwork: Popular and Local Meanings for a Common Ideal Associated with Positive Youth Development   |      | both girls & boys   | US (Chicago) / Angola | qualitative     |                              |                    | general                    | Teammates            |
| Gustafsson | 2016 | parents         | Profiles of perfectionism, parental climate, and burnout among competitive junior athletes                         | 237  | both girls & boys   | Sweden                | cross-sectional | 16 to 19 years old           | adolescent         | team and individual sports | Motivational climate |
| Hellstedt  | 2005 | family          | Invisible players: a family systems model                                                                          |      | both girls and boys |                       | REVIEW          |                              |                    |                            | Parent support       |
| Hennessy   | 2007 | parents         | Personal predictors of spectator aggression at little league baseball games                                        | 128  | both boys and girls | US (NY)               | cross-sectional | parents of 8 to 15 year olds | child & adolescent | baseball                   | Parent support       |

|           |      |                 |                                                                                                                                                               |     |                     |                    |                 |             |            |                     |                           |
|-----------|------|-----------------|---------------------------------------------------------------------------------------------------------------------------------------------------------------|-----|---------------------|--------------------|-----------------|-------------|------------|---------------------|---------------------------|
| Hines     | 1989 | peers & parents | Sports competition and its influence on self-esteem development                                                                                               | 201 | both girls and boys | US                 | cross-sectional | ?           |            | basketball          | Multiple                  |
| Hoigaard  | 2007 | peers           | Perceived social loafing and anticipated effort reduction among young football (soccer) players: an achievement goal perspective                              | 170 | boys only           | Norway             | cross-sectional | 15 to 20    | adolescent | soccer              | Motivational climate      |
| Holland   | 1994 | peers           | Athletic Participation and the Social Status of Adolescent Males and Females                                                                                  | 422 | both girls & boys   | US                 | cross-sectional | high school | adolescent | general             | Social Norms              |
| Hopwood   | 2015 | siblings        | Sibling dynamics and sport expertise                                                                                                                          | 229 | both girls & boys   | Australia & CANADA | cross-sectional |             |            | general             | Sporting family           |
| Hosseini  | 2013 | parents         | Qualitative Iranian study of parents' roles in adolescent girls' physical activity habit development                                                          | 16  | girls               | Iran               | qualitative     | 10 to 19    | adolescent | general             | Parent support            |
| Imtiaz    | 2016 | peers           | Examining Young Recreational Male Soccer Players' Experience in Adult- and Peer-Led Structures                                                                | 27  | boys only           | Canada             | experimental    | 10 to 12    | child      | soccer              | Teammates                 |
| Jackson   | 2014 | peers           | I think they believe in me: the predictive effects of teammate- and classmate-focused relation-inferred self-efficacy in sport and physical activity settings | 457 | both girls & boys   | Australia          | cross-sectional | 12 to 18    | adolescent | water polo; general | Teammates                 |
| Jakobsson | 2014 | peers           | What makes teenagers continue? A salutogenic approach to understanding youth participation in Swedish club sports                                             | 18  | both girls & boys   | Sweden             | qualitative     | 15 to 19    | adolescent | general             | Reasons for participation |



|           |      |                 |                                                                                                                                                      |     |                     |           |                              |             |                    |          |                      |
|-----------|------|-----------------|------------------------------------------------------------------------------------------------------------------------------------------------------|-----|---------------------|-----------|------------------------------|-------------|--------------------|----------|----------------------|
| Joesaar   | 2011 | peers           | Peer influence on young athletes' need satisfaction, intrinsic motivation and persistence in sport: A 12-month prospective study                     | 424 | both girls & boys   | Estonia   | cross-sectional              | 12 to 15    | adolescent         | general  | Motivational climate |
| Joesaar   | 2012 | peers           | Youth athletes' perception of autonomy support from the coach, peer motivational climate and intrinsic motivation in sport setting: One-year effects | 362 | both girls & boys   | Estonia   | longitudinal                 | 11 to 16    | adolescent         | general  | Motivational climate |
| Kane      | 1998 | peers           | The female athletic role as a status determinant within the social systems of high school adolescents                                                | 232 | girls               | US        | cross-sectional              | high school | adolescent         | general  | Social Norms         |
| Keresztes | 2008 | peers & parents | Social influences in sports activity among adolescents                                                                                               | 548 | both boys and girls | Hungary   | cross-sectional              | 10 to 15    | adolescent         | general  | Reasons/barr<br>iers |
| Kipp      | 2013 | peers           | Social influences, psychological need satisfaction, and well-being among female adolescent gymnasts                                                  | 303 | both girls & boys   | US        | cross-sectional              | 10 to 17    | adolescent         | gymnasts | Motivational climate |
| Kipp      | 2015 | peers           | Social predictors of psychological need satisfaction and well-being among female adolescent gymnasts: A longitudinal analysis                        | 174 | girls               | US        | longitudinal                 | 10 to 17    | adolescent         | gymnasts | Motivational climate |
| Kirk      | 1997 | parents         | The economic impact on families of children's participation in junior sport                                                                          | 220 | both girls & boys   | Australia | cross-sectional /qualitative | 9 to 17     | child & adolescent | general  | Parent support       |

|           |      |                 |                                                                                                      |       |                     |           |                                                            |          |                    |            |                           |
|-----------|------|-----------------|------------------------------------------------------------------------------------------------------|-------|---------------------|-----------|------------------------------------------------------------|----------|--------------------|------------|---------------------------|
| Knight    | 2016 | parents         | Influences on parental involvement in youth sport                                                    | 70    | both boys and girls | US & UK   | qualitative                                                | parents  |                    | general    | Parent support            |
| Kobel     | 2015 | parents         | Correlates of habitual physical activity and organized sports in German primary school children      | 1714  | both boys and girls | Germany   | cross-sectional                                            | 6 to 7   | child              | general    | Sporting family           |
| Landers   | 1969 | siblings        | Sibling-Sex-Status and Ordinal Position Effects on Females' Sport Participation and Interests        | 202   | girls               | US        | cross-sectional                                            |          |                    | general    | Family structure          |
| Le Bars   | 2009 | peers & parents | Personal and contextual determinants of elite young athletes' persistence or dropping out over time  | 82    | both girls & boys   | France    | cross-sectional                                            | 15 to 18 | adolescent         | judo       | Motivational climate      |
| Lee       | 2010 | parents         | Correlates of children and parents being physically active together                                  | 5177  | both boys and girls | US        | cross-sectional (Youth Media Campaign Longitudinal Survey) | 9 to 13  | child & adolescent | general    | Sporting family           |
| Light     | 2009 | peers & parents | Children's Reasons for Joining Sport Clubs and Staying in Them: A Case Study of a Sydney Soccer Club | 20    | both girls & boys   | Australia | qualitative                                                | 9 to 12  | child              | soccer     | Reasons for participation |
| Longhurst | 1987 | peers           | Participation motivation of Australian children involved in organized sport                          | 326   | both girls & boys   | Australia | cross-sectional                                            | 8 to 18  | child & adolescent | general    | Reasons for participation |
| Maia      | 2014 | family          | Familial resemblance of physical activity levels in the Portuguese population                        | 10644 | both girls & boys   | Portugal  | cross-sectional                                            |          |                    | general PA | Sporting family           |

|           |      |                 |                                                                                                                                                                        |       |                     |                   |                    |                             |                    |             |                      |
|-----------|------|-----------------|------------------------------------------------------------------------------------------------------------------------------------------------------------------------|-------|---------------------|-------------------|--------------------|-----------------------------|--------------------|-------------|----------------------|
| Mathur    | 2006 | peers           | Relations of Friends' Activities to Friendship Quality                                                                                                                 | 105   | both boys and girls | US                | cross-sectional    | 4th & 8th graders           | child & adolescent | general     | Friendships          |
| McCarthy  | 2008 | peers & parents | Understanding enjoyment in youth sport: A developmental perspective                                                                                                    | 152   | both boys and girls | England           | cross-sectional    | 8 to 15                     | child & adolescent | general     | Motivational climate |
| McDonough | 2005 | peers           | Sport participation motivation in young adolescent girls: the role of friendship quality and self-concept                                                              | 227   | girls               | Canada            | cross-sectional    | 11 to 14 years old          | adolescent         | team sports | Friendships          |
| McHale    | 1999 | family          | Family context and gender role socialization in middle childhood: comparing girls to boys and sisters to brothers                                                      | 200   | both boys and girls | US (Pennsylvania) | cross-sectional    | 1st = 4th/5th<br>2nd = 1to3 | child              | general     | Social Norms         |
| McMillan  | 2016 | parents         | Family Structure as a Correlate of Organized Sport Participation among Youth                                                                                           | 21201 | both boys and girls | Canada            | cross-sectional    | grades 6-10                 | child & adolescent | general     | Family structure     |
| McPherson | 1980 | peers & parents | The social system of age group swimming: the perceptions of swimmers, parents and coaches                                                                              | 1090  | both girls & boys   | Canada            | cross-sectional    | 11 to 16                    | adolescent         | swimming    | Parent support       |
| Nash      | 1993 | siblings        | The Influence of Older Siblings on the Sex-Typed Toy Play of Young Children                                                                                            | 60    | both girls & boys   | US                | cross-sectional    | 2 to 5                      | child              | general     | Social Norms         |
| Nathan    | 2013 | peers           | We wouldn't of made friends if we didn't come to Football United: the impacts of a football program on young people's peer, prosocial and cross-cultural relationships | 142   | both girls & boys   | Australia         | quasi-experimental | 11 to 17                    | adolescent         | football    | Teammates            |

|           |      |         |                                                                                                                                                        |      |                     |                |                 |                    |                    |                    |                      |
|-----------|------|---------|--------------------------------------------------------------------------------------------------------------------------------------------------------|------|---------------------|----------------|-----------------|--------------------|--------------------|--------------------|----------------------|
| Ommundsen | 2005 | peers   | Peer relationships in adolescent competitive soccer: associations to perceived motivational climate, achievement goals and perfectionism               | 1719 | both girls & boys   | Norway         | cross-sectional | 12 to 19           | adolescent         | soccer             | Motivational climate |
| Ommundsen | 2006 | parents | Parental and coach support or pressure on psychosocial outcomes of pediatric athletes in soccer                                                        | 677  | both boys and girls | Norway         | cross-sectional | 10 to 14 years old | adolescent         | soccer             | Parent support       |
| Park      | 2014 | parents | Parents' perspectives and young athletes' perceptions of social support                                                                                | 20   | both boys and girls | Korea          | qualitative     | 11 to 14           | adolescent         | tennis             | Parent support       |
| Poulin    | 2013 | peers   | Friendships with Co-Participants in Organized Activities: Prevalence, Quality, Friends' Characteristics, and Associations with Adolescents' Adjustment | 281  | both girls & boys   | Canada         | cross-sectional | 8th graders        | adolescent         | general            | Friendships          |
| Power     | 1994 | parents | Parenting practices and age-group swimming: a correlational study                                                                                      | 44   | both boys & girls   | United States  | cross-sectional | 6 to 14            | child & adolescent | Age-group swimming | Parent support       |
| Quarmby   | 2011 | parents | Associations between children's physical activities, sedentary behaviours and family structure: a sequential mixed methods approach                    | 381  | both girls & boys   | United Kingdom | cross-sectional | 11 to 14           | adolescent         | general            | Family structure     |
| Riley     | 2011 | peers   | Perceived coach-athlete and peer relationships of young athletes and self-determined motivation for sport                                              | 211  | both girls & boys   | US             | cross-sectional | 12 to 15           | adolescent         | basketball         | Motivational climate |

|                |      |                 |                                                                                                                        |        |                     |               |                                             |                              |                    |                                                          |                           |
|----------------|------|-----------------|------------------------------------------------------------------------------------------------------------------------|--------|---------------------|---------------|---------------------------------------------|------------------------------|--------------------|----------------------------------------------------------|---------------------------|
| Sanchez-Miguel | 2013 | parents         | The Importance of Parents' Behavior in their Children's Enjoyment and Amotivation in Sports                            | 723    | both girls & boys   | Spain         | cross-sectional                             | Players 11-16, Parents 36-49 | adolescent         | Basketball, handball, football, and volleyball           | Motivational climate      |
| Sanz-arazuri   | 2012 | parents         | Parental predictors of physical inactivity in spanish adolescents                                                      | 11,259 | both girls & boys   | Spain         | cross-sectional/q ualitative                | 12 to 16                     | adolescent         | Physical Activity (generally)                            | Sporting family           |
| Schaefer       | 2011 | peers           | The contribution of extracurricular activities to adolescent friendships: new insights through social network analysis | 67,124 | both girls & boys   | US            | longitudinal (Add Health) & cross-sectional | 7th to 12th grade            | adolescent         | general                                                  | Friendships               |
| Shields        | 2007 | peers           | Predictors of poor sportspersonship in youth sports: personal attitudes and social influences                          | 676    | both boys and girls | US            | cross-sectional                             | 5th to 8th grades            | child & adolescent | basketball, soccer, football, hockey, baseball, lacrosse | Teammates                 |
| Smith          | 2010 | peers           | Peer motivational climate and burnout perceptions of adolescent athletes                                               | 206    | both girls & boys   | Sweden        | cross-sectional                             | 16 to 19                     | adolescent         | general                                                  | Motivational climate      |
| Snyder         | 1976 | peers & parents | Correlates of sport participation among adolescent girls                                                               | 230    | both boys and girls | US (ohio)     | cross-sectional                             | high school                  | adolescent         | gymnastics, basketball, track                            | Multiple                  |
| Stern          | 1990 | peers           | Young children in recreational sports. Participation motivation                                                        | 314    | boys                | US (arkansas) | cross-sectional                             | 6 to 10                      | child              | general                                                  | Reasons for participation |
| Stuij          | 2015 | family          | Habitus and Social Class: A Case Study on Socialisation into Sports and Exercise                                       | 93     | both boys and girls | Netherlands   | qualitative                                 | 9 to 11                      | child              | general                                                  | Sporting family           |
| Stuntz         | 2003 | peers           | Influence of social goal orientations and peers on unsportsmanlike play                                                | 406    | both boys and girls | US            | cross-sectional                             | 11 to 15                     | adolescent         | general                                                  | Motivational climate      |
| Stuntz         | 2009 | peers           | Achievement goal orientations and motivational                                                                         | 303    | girls               | US            | cross-sectional                             | 11 to 14 years old           | adolescent         | general                                                  | Motivational climate      |

outcomes in youth sport: The role of social orientations

|                    |      |                 |                                                                                                                                                                                                   |       |                     |               |                 |                |                    |                                  |                      |
|--------------------|------|-----------------|---------------------------------------------------------------------------------------------------------------------------------------------------------------------------------------------------|-------|---------------------|---------------|-----------------|----------------|--------------------|----------------------------------|----------------------|
| Sukys              | 2014 | parents         | Do parents' exercise habits predict 13-18-year-old adolescents' involvement in sport?                                                                                                             | 2,335 | both girls & boys   | Lithuania     | cross-sectional | 13-18          | adolescent         | Sports participation (generally) | Sporting family      |
| te Velde           | 2014 | peers & parents | Parents and friends both matter: simultaneous and interactive influences of parents and friends on European schoolchildren's energy balance-related behaviours - the ENERGY cross-sectional study | 7811  | both boys and girls | Europe        | cross-sectional | 10 to 12 years | child              | none                             | Multiple             |
| Toftegaard_stockel | 2011 | parents         | Parental, socio and cultural factors associated with adolescents' sports participation in four Danish municipalities                                                                              | 6,356 | both girls & boys   | Denmark       | cross-sectional | 12 to 16       | adolescent         | Sports participation (generally) | Sporting family      |
| Vazou              | 2006 | peers           | Predicting young athletes' motivational indices as a function of their perceptions of the coach- and peer-created climate                                                                         | 493   | both boys and girls | England       | cross-sectional | 12 to 17       | adolescent         | general                          | Motivational climate |
| Vazou              | 2010 | peers           | Variations in the perceptions of peer and coach motivational climate                                                                                                                              | 486   | both boys and girls | England       | cross-sectional | 12 to 16       | adolescent         | general                          | Motivational climate |
| Vazou              | 2005 | peers           | Peer motivational climate in youth sport: A qualitative inquiry                                                                                                                                   | 30    | both boys and girls | England       | qualitative     | 12 to 16       | adolescent         | general                          | Motivational climate |
| Visek              | 2015 | peers & parents | The fun integration theory: toward sustaining children and adolescents sport participation                                                                                                        | 236   | both boys and girls | United States | cross-sectional | 9 to 19 years  | child & adolescent | soccer                           | Multiple             |

|                |      |          |                                                                                                                                                |     |                     |               |                 |               |            |             |                      |
|----------------|------|----------|------------------------------------------------------------------------------------------------------------------------------------------------|-----|---------------------|---------------|-----------------|---------------|------------|-------------|----------------------|
| White          | 2004 | parents  | Perceived parental beliefs about the causes of success in sport: relationship to athletes' achievement goals and personal beliefs              | 183 | both boys & girls   | United States | cross-sectional | 11 to 18      | adolescent | Team Sports | Motivational climate |
| Whiteman       | 2007 | siblings | Explaining Sibling Similarities: Perceptions of Sibling Influences                                                                             | 191 | both boys and girls | US            | cross-sectional | 13 to 18      | adolescent | general     | Sporting family      |
| Yungblut et al | 2012 | peers    | Views of adolescent female youth on physical activity during early adolescence                                                                 | 35  | girls               | Canada        | qualitative     | 12 to 18      | adolescent | general     | Social Norms         |
| Zahra et al    | 2015 | parents  | He's probably more Mr. sport than me--a qualitative exploration of mothers' perceptions of fathers' role in their children's physical activity | 37  | both girls & boys   | UK            | cross-sectional | Not specified |            | general     | Parent support       |
